# Supplementary material
Source: PubMed Central journal article supplement (PMC3691927)
Supplement: Supp_Fig1.pdf [file Supp_Fig1.pdf]

## Supplementary Data

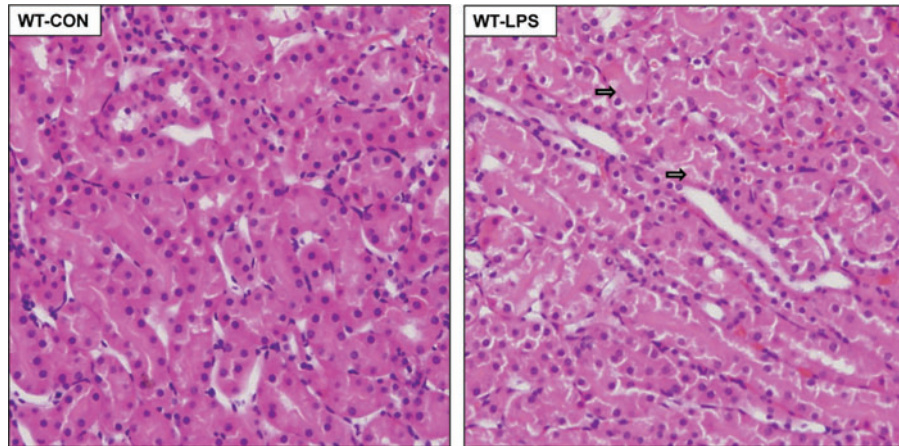

**SUPPLEMENTARY FIG. S1.** Representative hematoxylin and eosin–stained kidney sections demonstrating damage in corticomedullary areas of the LPS-treated wild-type mice (WT-LPS), showing swelling (arrows) of epithelial cells with focal desquamation of the brush borders.
