# Supplementary material
Source: PubMed Central journal article supplement (PMC3691927)
Supplement: Supp_Fig2.pdf [file Supp_Fig2.pdf]

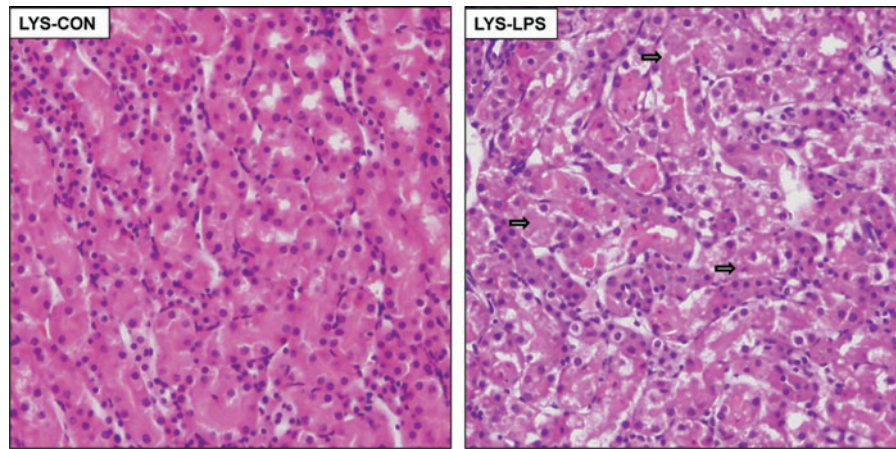

**SUPPLEMENTARY FIG. S2.** Representative hematoxylin and eosin–stained kidney sections demonstrating damage in corticomedullary areas of the LPS-treated Lyst-mice (LYS-LPS), showing marked swelling of the epithelial cells, desquamation, and focal necrosis (arrows) of the epithelium.
