# Supplementary material
Source: PubMed Central journal article supplement (PMC3691927)
Supplement: Supp_Fig3.pdf [file Supp_Fig3.pdf]

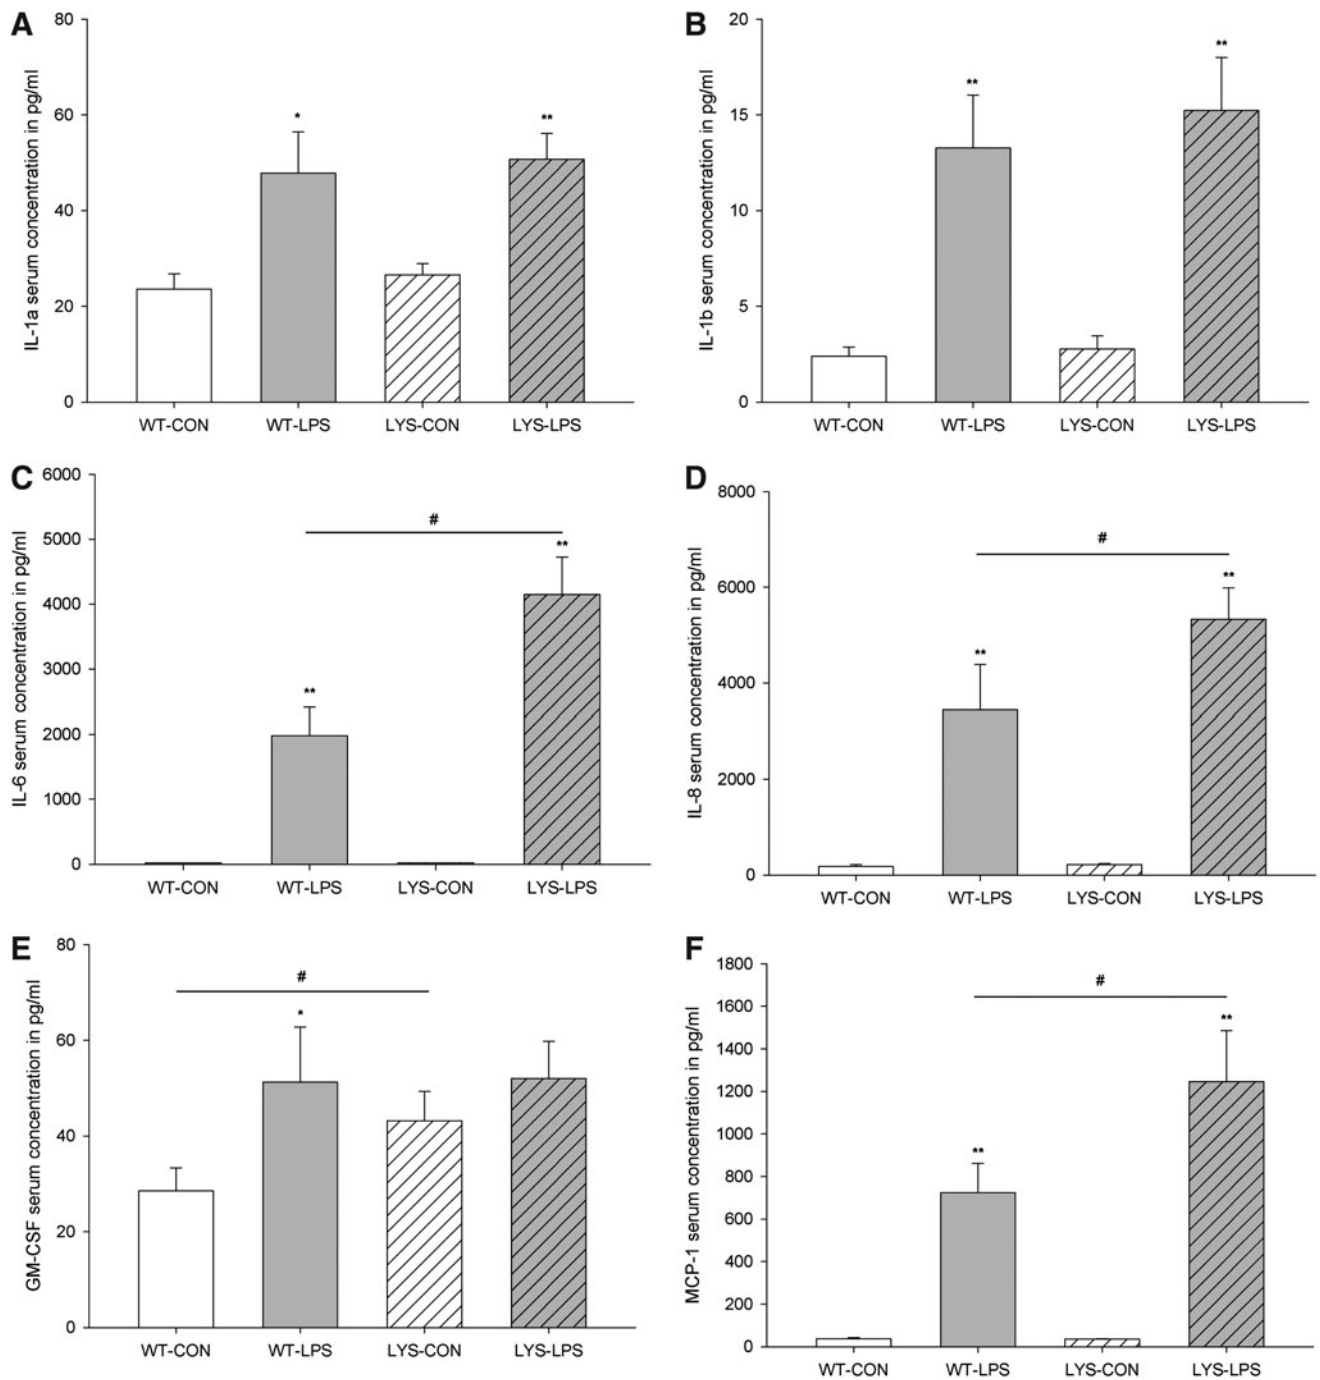

**SUPPLEMENTARY FIG. S3. Cytokines and chemokines levels in sera from WT and *Lys*- (LYS) mice, treated with LPS for 24 h.** The following parameters are presented: (A) interleukin (IL)-1 $\alpha$ , (B) IL-1 $\beta$ , (C) IL-6, (D) IL-8, (E) granulocyte colony-stimulating factor, and (F) monocyte chemotactic protein-1(MCP1). The concentrations of cyto- and chemokines were measured using a Luminex IS100 analyzer and analyzed using appropriate curve-fitting software (Luminex 100IS, version 2.3). All results are presented as fold-increases compared to WT controls (WT-CON). Animals were injected with 5 mg/kg of LPS in phosphate-buffered saline vehicle or vehicle only, and sacrificed after 24 h. Data are means  $\pm$  SEM, \* $p$  < 0.05, \*\* $p$  < 0.01 LPS versus CON; # $p$  < 0.05 LYS versus WT.
