# Supplementary material
Source: PubMed Central journal article supplement (PMC3691927)
Supplement: Supp_Fig4.pdf [file Supp_Fig4.pdf]

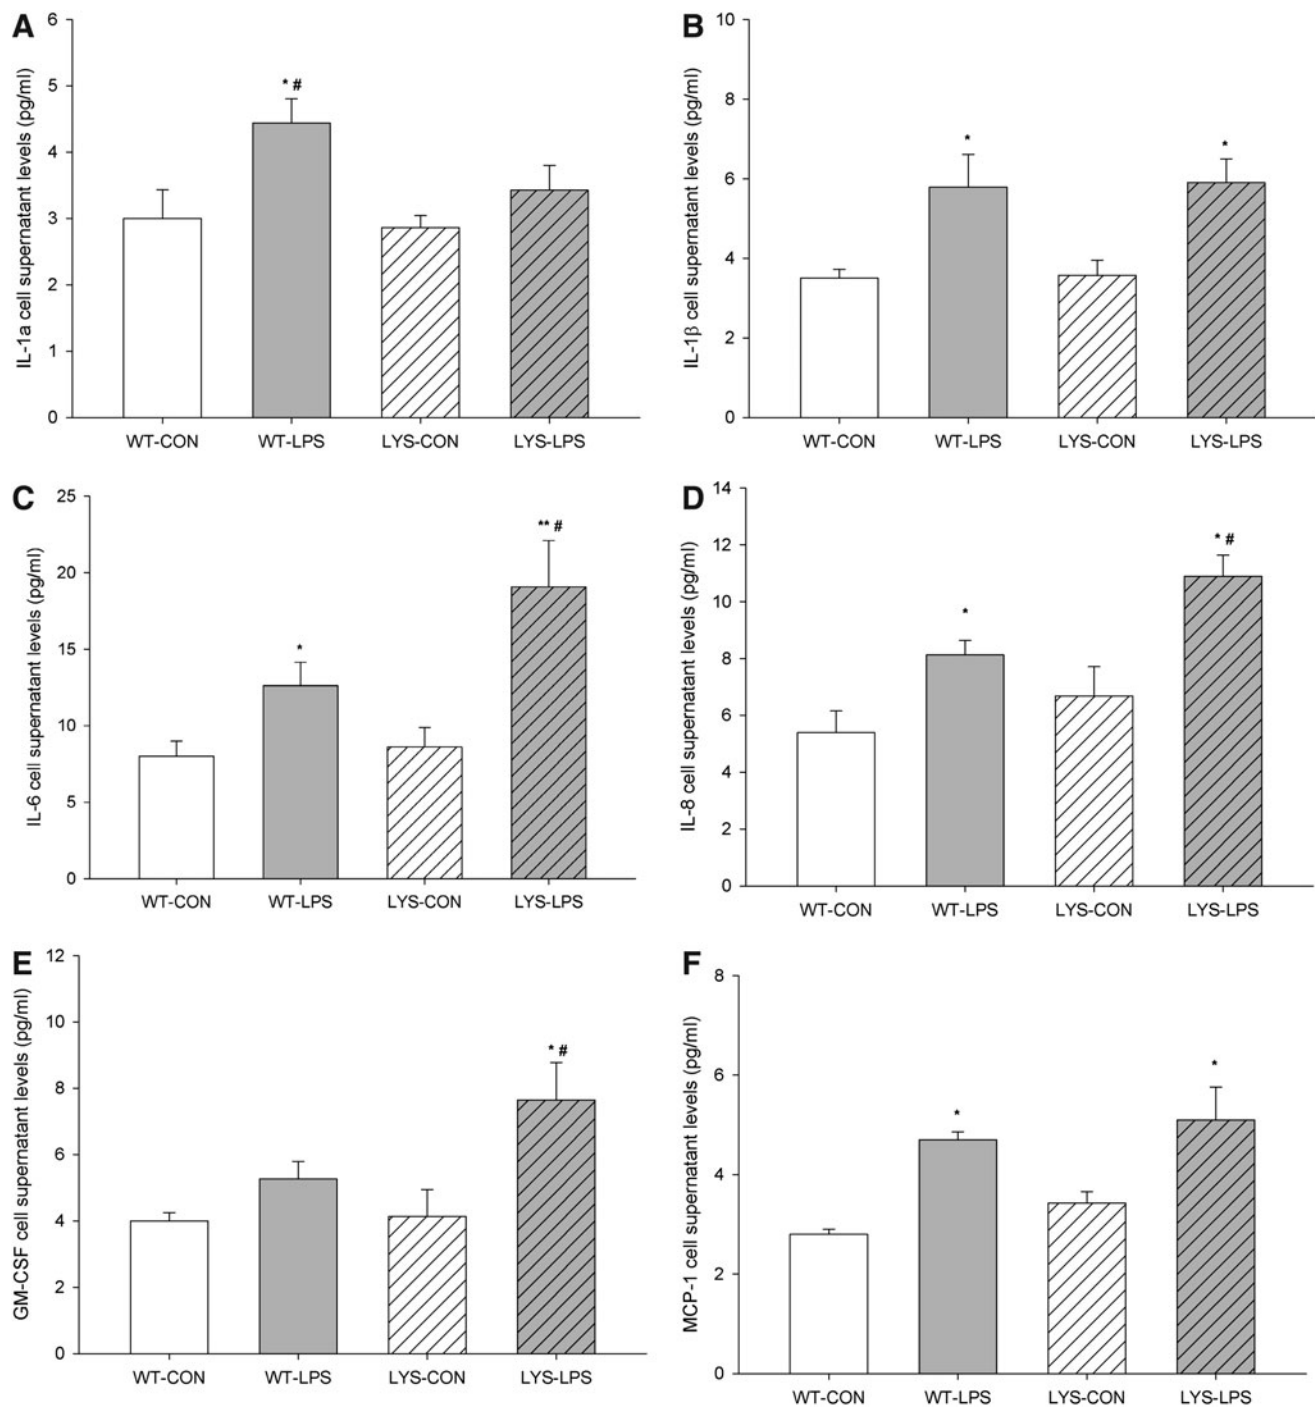

**SUPPLEMENTARY FIG. S4.** Cytokines and chemokines levels in culture supernatants of primary endothelial cells isolated from WT or *Lys*- (LYS) mice, and stimulated with LPS for 24 h. The following parameters were presented: (A) IL-1 $\alpha$ , (B) IL-1 $\beta$ , (C) IL-6, (D) IL-8, (E) granulocyte-macrophage colony-stimulating factor, and (F) MCP1. The concentrations of cyto- and chemokines were measured using a Luminex IS100 analyzer and analyzed using appropriate curve-fitting software (Luminex 100IS, version 2.3). Endothelial cells were isolated from three different animals in each group and treated with 1  $\mu$ g/ml LPS for 24 h (WT-LPS and LYS-LPS). Data are means  $\pm$  SEM, \* $p$  < 0.05, \*\* $p$  < 0.01 LPS versus CON; # $p$  < 0.05 LYS versus WT.
