# Supplementary material
Source: PubMed Central journal article supplement (PMC3691927)
Supplement: Supp_Fig6.pdf [file Supp_Fig6.pdf]

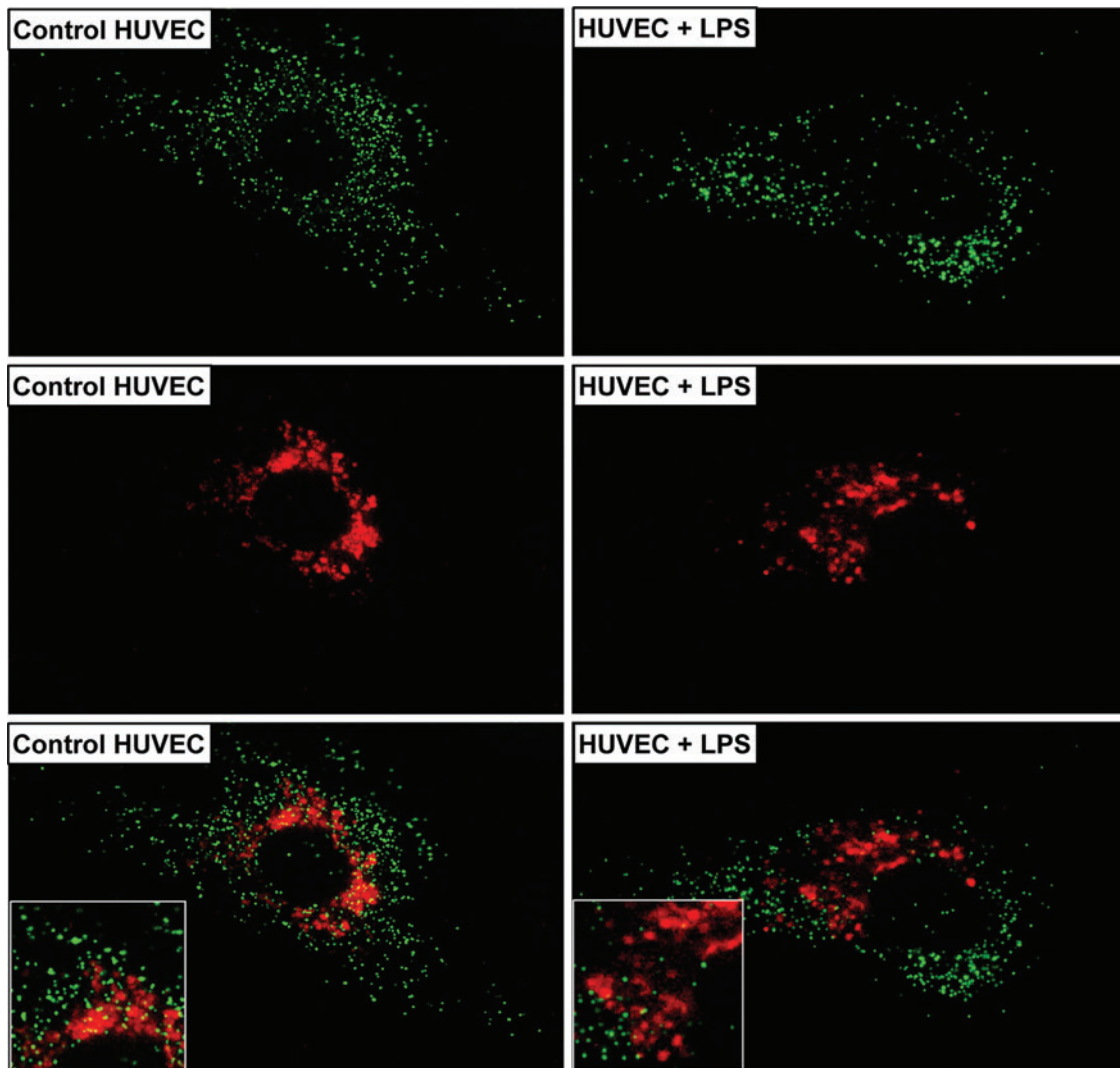

**SUPPLEMENTARY FIG. S6. Representative images of HUVEC with green labeled peroxisomes and Lysotracker-stained red lysosomes.** HUVEC were transduced with green fluorescent protein fused to peroxisomal targeting signal type 1 (PTS1). Cells were treated with 1  $\mu\text{g}/\text{ml}$  LPS for 6 hours (HUVEC + LPS). Untreated cells served as a control (CONTROL HUVEC). To demonstrate the spatial relationship of peroxisomes and lysosomes, images were taken sequentially through the whole cell volumes and then overlapped. There is evident reduction of peroxisomal density in the areas within close proximity to lysosomes in cells treated with LPS.
